# Supplementary material for: Dissolution mechanism of Fe3O4 scale by 1-hydroxyethane-1,1-diphosphonic acid: an ab initio molecular metadynamics study
Source: Royal Society of Chemistry journal article supplement (doi:10.1039/d3cp01736b), 2023-01-01
Supplement: d3cp01736b1.pdf [file d3cp01736b1.pdf]

## Electronic Supplementary Information

### Dissolution Mechanism of Fe<sub>3</sub>O<sub>4</sub> Scale by 1-Hydroxyethane-1,1-Diphosphonic Acid: an *Ab Initio* Molecular Metadynamics Study

Xiaoyang Zhao,<sup>a</sup> Guo Jin,<sup>b</sup> Ding Guo,<sup>a</sup> Xin Xiao,<sup>c</sup> Junmin Nan,<sup>\*c</sup> and Chen Wu<sup>\*d,e</sup>

<sup>a</sup> School of Geomatic and Environmental Engineering, Henan Polytechnic Institute, Nanyang 473000, P.R. China.

<sup>b</sup> School of Automation Engineering, Henan Polytechnic Institute, Nanyang 473000, P.R. China.

<sup>c</sup> School of Chemistry, South China Normal University, Guangzhou 510006, P.R. China. E-mail: jmnan@scnu.edu.cn

<sup>d</sup> Department of Physics, School of Science, Harbin University of Science and Technology, Harbin 150080, P.R. China. E-mail: wuchenwf@126.com

<sup>e</sup> College of Material Science and Engineering, Key Laboratory of Advanced Structural Materials, Ministry of Education, Changchun University of Technology, Changchun 130012, P.R. China

**Table S1** Experimental results of dissolution of iron scale by organic acid

| Abbreviation | Name                                                              | Whether iron scale is dissolved |
|--------------|-------------------------------------------------------------------|---------------------------------|
| HEDP         | 1-Hydroxyethane-1,1-diphosphonic Acid                             | Yes                             |
| PBTCA        | 2-Phosphonobutane-1,2,4-tricarboxylic Acid                        | No                              |
| ATMP         | Amino Trimethylene Phosphonic Acid                                | No                              |
| EDTMP        | Ethylenediamine Tetramethylenephosphonic Acid                     | No                              |
| BHMTMPMPA    | Bis(Hexamethylene Triamine Penta (Methylene Phosphonic Acid))     | No                              |
| DTPMP        | Diethylenetriaminepenta(methylene-phosphonic acid)                | No                              |
| HDTMP        | Hexamethylenediamine-N,N,N',N'-tetrakis(methylenephosphonic acid) | No                              |
| PAPEMP       | Polyamino Polyether Methylene Phosphonate                         | No                              |

Note: The iron scale was collected from Pingdingshan Halon Salt Co. Ltd. After chemical analysis, the purity of Fe<sub>3</sub>O<sub>4</sub> is 98.5 wt%. The samples were stored in a dry and cool place before use. The organic acids were obtained from Shandong Taihe Technologies Co., Ltd. with a purity of 97 %. At room temperature, 200 ml of 5 wt% organic acid solution and 3.00 g iron scale samples were added to the beaker for 12 hours. In addition to HEDP, the iron scale cannot be dissolved after 30 days of soaking with other organic acids. The entire process was conducted at room temperature. The experimental results are taken from Ref 1.

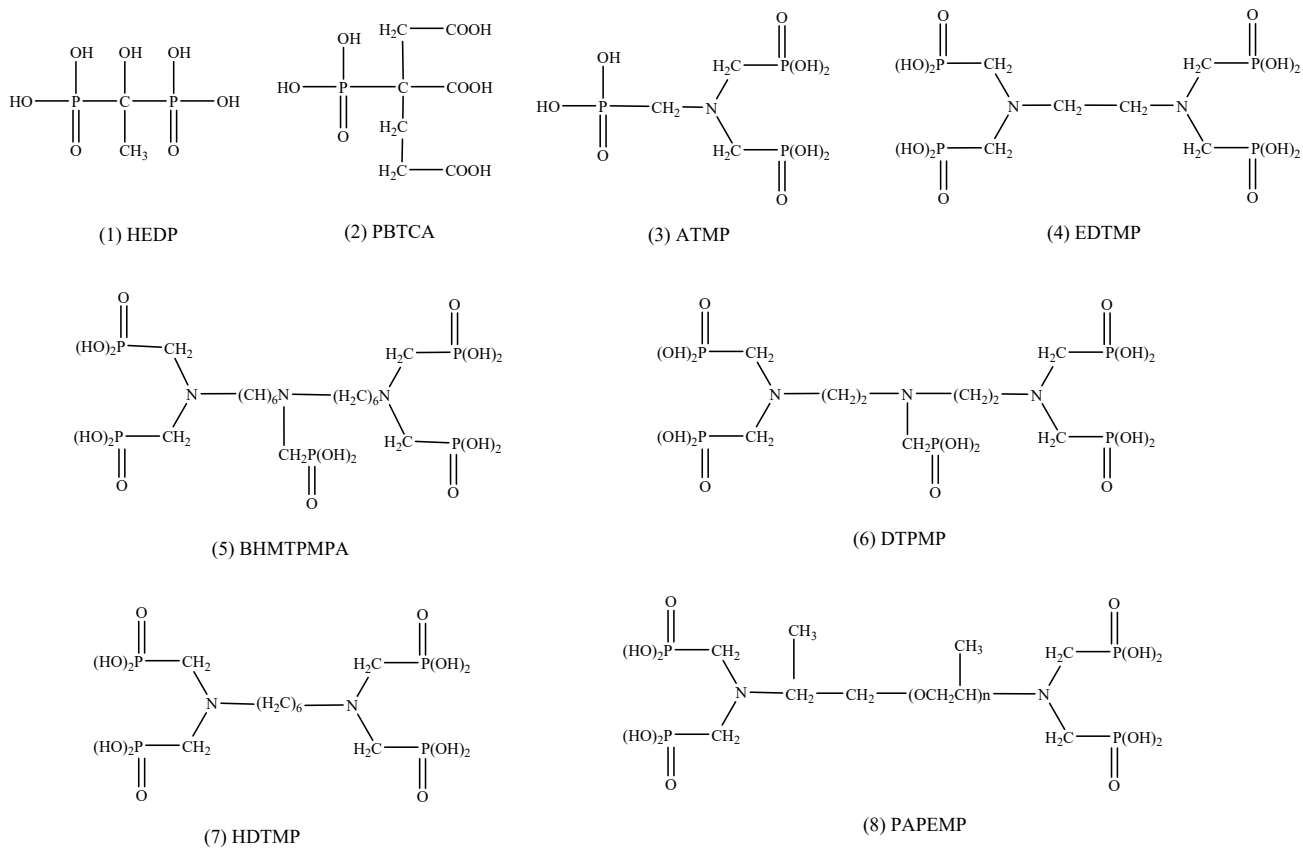

**Figure S1.** The structure formula of organic acid

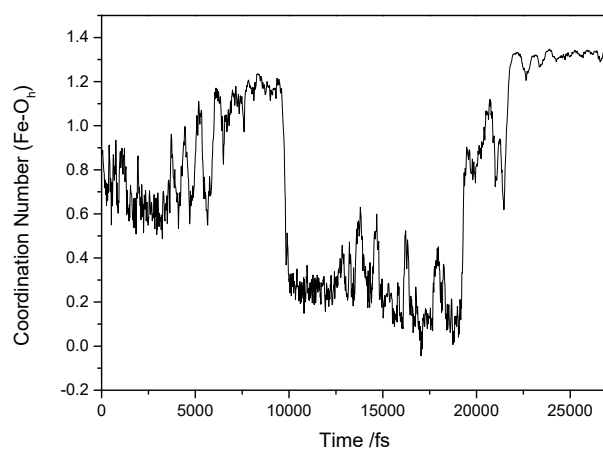

**Figure S2.** The change in coordination number between O atoms of HEDP and Fe<sup>3+</sup> ion

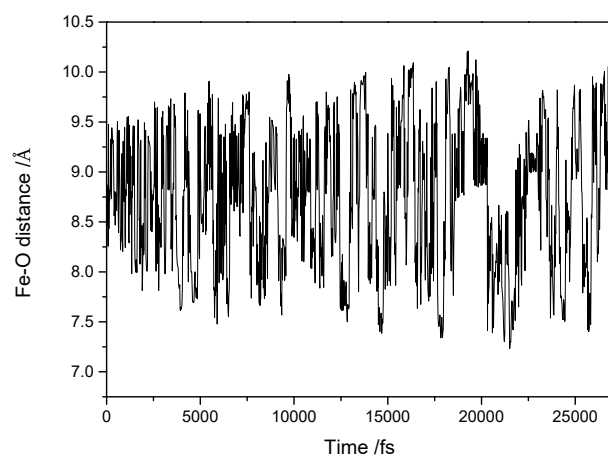

**Figure S3.** The change in four bond lengths between the  $\text{Fe}^{3+}$  ion and the four O atoms of HEDP

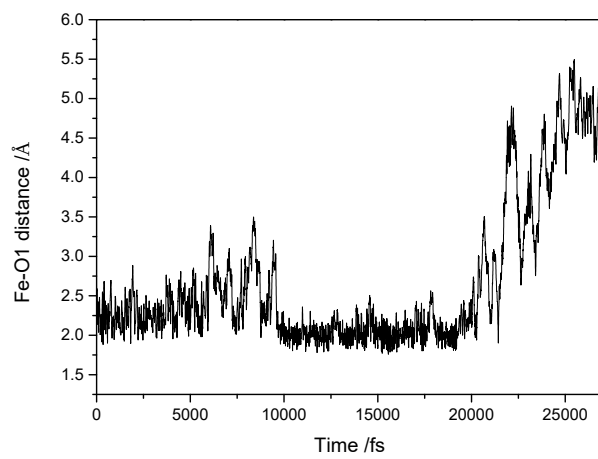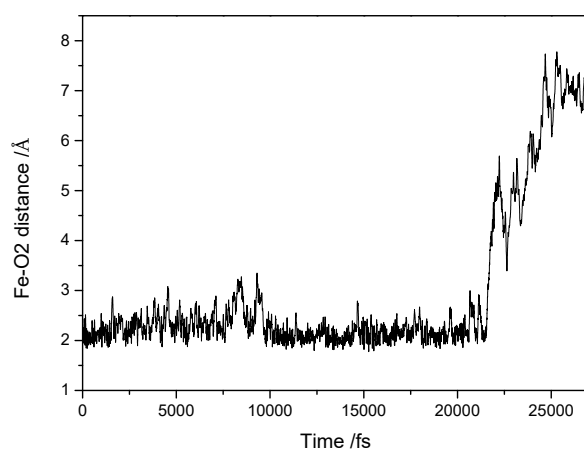

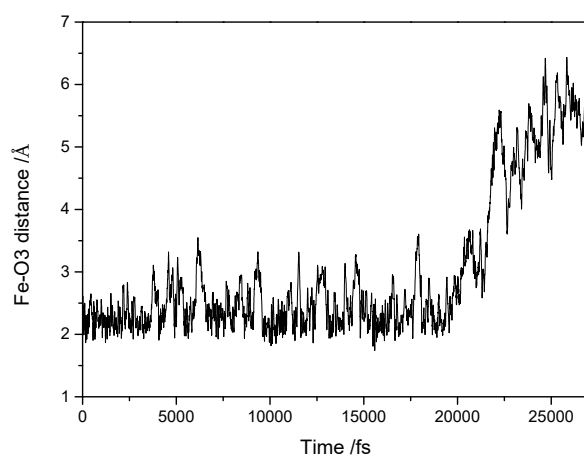

**Figure S4.** The change in bond lengths of the  $\text{Fe}^{3+}$  ion with the original O atoms

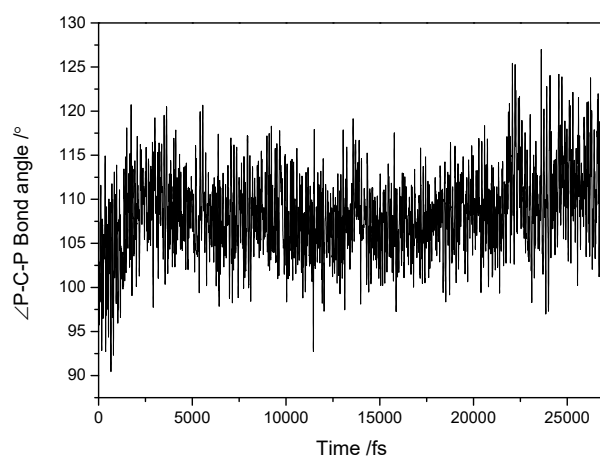

**Figure S5.** The change in bond angle of  $\angle\text{P-C-P}$  angles of HEDP

Reference:

1. X. Zhao, S. Li, M. Su and S. Xu, *Journal of Molecular Science*, 2015, 31, 276-282. (In Chinese)
